# Supplementary material
Source: publisher figshare collection journal article supplement (https://springernature.figshare.com/ndownloader/files/12979289)
Supplement: Supplementary file [file 12979289]

| <b>Table S3</b> Steady State Data Summary. Results are expressed as mean $\pm$ SD. |                     |                     |     |                     |                     |                |                     |                     |     |
|------------------------------------------------------------------------------------|---------------------|---------------------|-----|---------------------|---------------------|----------------|---------------------|---------------------|-----|
| <b>RT (days)</b>                                                                   | Reactor 1           |                     |     | Reactor 2           |                     |                | Reactor 3           |                     |     |
|                                                                                    | Mean $\pm$ SD       | # of data pts       |     | Mean $\pm$ SD       | # of data pts       |                | Mean $\pm$ SD       | # of data pts       |     |
| Fractional carbohydrate solubilization                                             |                     |                     |     |                     |                     |                |                     |                     |     |
| <b>20</b>                                                                          | 0.712 $\pm$ 0.019   | 24                  |     | 0.697 $\pm$ 0.012   | 7                   |                | 0.72 $\pm$ 0.024    | 7                   |     |
| <b>10</b>                                                                          |                     |                     |     | 0.664 $\pm$ 0.026   | 7                   |                | 0.644 $\pm$ 0.014   | 7                   |     |
| <b>5</b>                                                                           |                     |                     |     | 0.594 $\pm$ 0.011   | 6                   |                | 0.568 $\pm$ 0.008   | 6                   |     |
| <b>3.3</b>                                                                         |                     |                     |     | 0.542 $\pm$ 0.024   | 2                   |                | 0.535 $\pm$ 0.010   | 2                   |     |
| Biogas production rate (mL/day)                                                    |                     |                     |     |                     |                     |                |                     |                     |     |
| <b>20</b>                                                                          | 465.3 $\pm$ 16.8    | 76                  |     | 416.8 $\pm$ 18.9    | 25                  |                | 458.2 $\pm$ 29.9    | 25                  |     |
| <b>10</b>                                                                          |                     |                     |     | 851.3 $\pm$ 65.5    | 20                  |                | 928.8 $\pm$ 51.1    | 20                  |     |
| <b>5</b>                                                                           |                     |                     |     | 1530.8 $\pm$ 142.7  | 51                  |                | 1694.4 $\pm$ 117.6  | 51                  |     |
| <b>3.3</b>                                                                         |                     |                     |     | 2422.8 $\pm$ 283.1  | 10                  |                | 2324.3 $\pm$ 141.1  | 10                  |     |
| Biogas composition                                                                 |                     |                     |     |                     |                     |                |                     |                     |     |
|                                                                                    | CH <sub>4</sub> (%) | CO <sub>2</sub> (%) |     | CH <sub>4</sub> (%) | CO <sub>2</sub> (%) |                | CH <sub>4</sub> (%) | CO <sub>2</sub> (%) |     |
| <b>20</b>                                                                          | 50.3 $\pm$ 1.5      | 39.7 $\pm$ 1.4      | 38  | 50.9 $\pm$ 0.9      | 45.1 $\pm$ 0.7      | 20             | 49.9 $\pm$ 0.9      | 42.6 $\pm$ 0.7      | 20  |
| <b>10</b>                                                                          |                     |                     |     | 49.1 $\pm$ 1.3      | 47.2 $\pm$ 1.3      | 10             | 47.5 $\pm$ 1.3      | 44.8 $\pm$ 1.1      | 10  |
| <b>5</b>                                                                           |                     |                     |     | 47.8 $\pm$ 0.6      | 47.6 $\pm$ 2.4      | 11             | 46.9 $\pm$ 1.1      | 46.0 $\pm$ 3.1      | 11  |
| <b>3.3</b>                                                                         |                     |                     |     | 46.4 $\pm$ 0.6      | 47.0 $\pm$ 1.0      | 4              | 47.1 $\pm$ 0.7      | 44.9 $\pm$ 1.0      | 4   |
| Volatile fatty acids (g/L)                                                         |                     |                     |     |                     |                     |                |                     |                     |     |
|                                                                                    | Propionic           | Acetic              |     | Propionic           | Acetic              |                | Propionic           | Acetic              |     |
| <b>20</b>                                                                          | 0.017 $\pm$ 0.030   | 0                   | 31  | 0                   | 0                   | 7              | 0                   | 0                   | 7   |
| <b>10</b>                                                                          |                     |                     |     | 0                   | 0                   | 7              | 0.224 $\pm$ 0.033   | 0                   | 7   |
| <b>5</b>                                                                           |                     |                     |     | 0.321 $\pm$ 0.060   | 0                   | 6              | 0.335 $\pm$ 0.056   | 0                   | 6   |
| <b>3.3</b>                                                                         |                     |                     |     | 0.285 $\pm$ 0.020   | 0                   | 2              | 0.314 $\pm$ 0.047   | 0                   | 2   |
| pH <sup>a</sup>                                                                    |                     |                     |     |                     |                     |                |                     |                     |     |
| <b>20</b>                                                                          | 6.72 $\pm$ 0.05     |                     | 487 | 6.45 $\pm$ 0.02     |                     | 159            | 6.43 $\pm$ 0.04     |                     | 159 |
| <b>10</b>                                                                          |                     |                     |     | 6.40 $\pm$ 0.02     |                     | 64             | 6.36 $\pm$ 0.03     |                     | 64  |
| <b>5</b>                                                                           |                     |                     |     | 6.18 $\pm$ 0.04     |                     | 81             | 6.25 $\pm$ 0.02     |                     | 81  |
| <b>3.3</b>                                                                         |                     |                     |     | 6.04 $\pm$ 0.03     |                     | 10             | 6.15 $\pm$ 0.02     |                     | 10  |
| Electron balance analysis                                                          |                     |                     |     |                     |                     |                |                     |                     |     |
| <b>20</b>                                                                          | 93.2 $\pm$ 3.6%     |                     | 8   | 84.7 $\pm$ 2.6%     |                     | 4              | 88.4 $\pm$ 2.5%     |                     | 4   |
| <b>10</b>                                                                          |                     |                     |     | 89.3%               |                     | 1 <sup>b</sup> | 93.8%               |                     | 1   |
| <b>5</b>                                                                           |                     |                     |     | 91.0 $\pm$ 5.2%     |                     | 2              | 101.1 $\pm$ 2.2%    |                     | 2   |
| <b>3.3</b>                                                                         |                     |                     |     | 96.4%               |                     | 1              | 97.6%               |                     | 1   |
| Mass balance                                                                       |                     |                     |     |                     |                     |                |                     |                     |     |
| <b>20</b>                                                                          | 92.8 $\pm$ 3.1%     |                     | 11  | 87.2 $\pm$ 3.8%     |                     | 7              | 91.0 $\pm$ 3.6%     |                     | 7   |
| <b>10</b>                                                                          |                     |                     |     | 95.8%               |                     | 1              | 95.6%               |                     | 1   |
| <b>5</b>                                                                           |                     |                     |     | 99.1 $\pm$ 2.1%     |                     | 2              | 105.7 $\pm$ 1.2%    |                     | 2   |
| <b>3.3</b>                                                                         |                     |                     |     | 97.1%               |                     | 1              | 97.8%               |                     | 1   |

<sup>a</sup> The dataset used was subsampled from the original pH dataset, which had 20 data points per hour and in total over 60,000 points. When subsampling, for every 100 points only one point was kept and the rest was eliminated. This led to 3-4 data points per day in the final pH dataset presented.

<sup>β</sup> If only sample from one time point were analyzed, then the standard deviation was not shown since it's only from analytical replicates.
